# Seasonal Carbonate Chemistry Covariation with Temperature, Oxygen, and Salinity in a Fjord Estuary: Implications for the Design of Ocean Acidification Experiments

Jonathan C. P. Reum<sup>1\*</sup>, Simone R. Alin<sup>2</sup>, Richard A. Feely<sup>2</sup>, Jan Newton<sup>3</sup>, Mark Warner<sup>4</sup>, Paul McElhany<sup>1</sup>

**1** Conservation Biology Division, Northwest Fisheries Science Center, National Marine Fisheries Service, National Oceanic and Atmospheric Administration, Seattle, Washington, United States of America, **2** Pacific Marine Environmental Laboratory, National Oceanic and Atmospheric Administration, Seattle, Washington, United States of America, **3** Applied Physics Laboratory, University of Washington, Seattle, Washington, United States of America, **4** School of Oceanography, University of Washington, Seattle, Washington, United States of America

## Abstract

Carbonate chemistry variability is often poorly characterized in coastal regions and patterns of covariation with other biologically important variables such as temperature, oxygen concentration, and salinity are rarely evaluated. This absence of information hampers the design and interpretation of ocean acidification experiments that aim to characterize biological responses to future pCO<sub>2</sub> levels relative to contemporary conditions. Here, we analyzed a large carbonate chemistry data set from Puget Sound, a fjord estuary on the U.S. west coast, and included measurements from three seasons (winter, summer, and fall). pCO<sub>2</sub> exceeded the 2008–2011 mean atmospheric level (392 μatm) at all depths and seasons sampled except for the near-surface waters (< 10 m) in the summer. Further, undersaturated conditions with respect to the biogenic carbonate mineral aragonite were widespread ( $\Omega_{ar} < 1$ ). We show that pCO<sub>2</sub> values were relatively uniform throughout the water column and across regions in winter, enriched in subsurface waters in summer, and in the fall some values exceeded 2500 μatm in near-surface waters. Carbonate chemistry covaried to differing levels with temperature and oxygen depending primarily on season and secondarily on region. Salinity, which varied little (27 to 31), was weakly correlated with carbonate chemistry. We illustrate potential high-frequency changes in carbonate chemistry, temperature, and oxygen conditions experienced simultaneously by organisms in Puget Sound that undergo diel vertical migrations under present-day conditions. We used simple calculations to estimate future pCO<sub>2</sub> and  $\Omega_{ar}$  values experienced by diel vertical migrators based on an increase in atmospheric CO<sub>2</sub>. Given the potential for non-linear interactions between pCO<sub>2</sub> and other abiotic variables on physiological and ecological processes, our results provide a basis for identifying control conditions in ocean acidification experiments for this region, but also highlight the wide range of carbonate chemistry conditions organisms may currently experience in this and similar coastal ecosystems.

**Citation:** Reum JCP, Alin SR, Feely RA, Newton J, Warner M, et al. (2014) Seasonal Carbonate Chemistry Covariation with Temperature, Oxygen, and Salinity in a Fjord Estuary: Implications for the Design of Ocean Acidification Experiments. PLoS ONE 9(2): e89619. doi:10.1371/journal.pone.0089619

**Editor:** Moncho Gomez-Gesteira, University of Vigo, Spain

**Received:** October 16, 2013; **Accepted:** January 21, 2014; **Published:** February 19, 2014

**Copyright:** © 2014 Reum et al. This is an open-access article distributed under the terms of the Creative Commons Attribution License, which permits unrestricted use, distribution, and reproduction in any medium, provided the original author and source are credited.

**Funding:** This research was supported by the NOAA Ocean Acidification Program, NOAA Pacific Marine Environmental Laboratory, the University of Washington including the PRISM program, and the Washington State Department of Ecology. Work in Hood Canal was partially funded through the Hood Canal Dissolved Oxygen Program via Naval Sea Systems Command Contract #N00024-02-D-6602 Task 50. J.C.P.R. was supported by a National Research Fellowship award. This work was co-sponsored by the National Oceanic and Atmospheric Administration's Northwest Fisheries Science Center, Pacific Marine Environmental Laboratory, Ocean Acidification Program, and Integrated Ocean Observing System Program; the University of Washington including Northwest Association of Networked Ocean Observing Systems (NANOOS), Puget Sound Regional Synthesis Model (PRISM), Applied Physics Laboratory, and School of Oceanography; and the Washington State Department of Ecology. Work in Hood Canal was partially funded through the Hood Canal Dissolved Oxygen Program via Naval Sea Systems Command Contract #N00024-02-D-6602 Task 50. The funders had no role in study design, data collection and analysis, decision to publish, or preparation of the manuscript.

**Competing Interests:** The authors have declared that no competing interests exist.

\* E-mail: Jonathan.Reum@noaa.gov

## Introduction

Global surface ocean pH levels have decreased by approximately 0.1 units since the Industrial Revolution and will potentially decline an additional 0.3 to 0.4 units over the next century due to anthropogenic CO<sub>2</sub> emissions [1–4]. This change in ocean chemistry, termed “ocean acidification” (OA), results in a reduction in the saturation state of carbonate minerals such as calcite and aragonite, elevates pCO<sub>2</sub>, and lowers pH [5]. A growing body of research indicates that such changes may impact a diversity of species, with some organisms benefiting from

increased pCO<sub>2</sub> availability (e.g., photosynthesizers), while others (e.g., echinoderms, molluscs, some fishes) may be adversely impacted by enhanced shell dissolution rates, reductions in metabolic scope, or neurological impairment [2,6–8]. A major challenge to inferring the ecological implications of these studies, however, is an incomplete understanding of present-day patterns of carbonate chemistry variability, particularly in coastal habitats [9–14].

In continental shelf and estuarine systems, complex physical processes and high rates of biological production act to perturb

pCO<sub>2</sub> levels away from conditions under air-sea gas equilibrium [9] and may exhibit considerable variability over interannual, seasonal, and daily time scales [10,14–17]. In contrast, researchers studying organisms from these systems often use IPCC projections of global average surface ocean carbonate chemistry conditions that correspond to assumptions of air-sea gas equilibrium to set control and experimental carbonate chemistry conditions [11,18]. Recognition of the potential disparity between conditions considered “controls” in OA experiments and actual carbonate chemistry conditions experienced by organisms in the habitats they occupy has been highlighted in a suite of recent publications [9,10,18–20]. Consequently, there is increasing awareness that researchers should attempt to simulate control conditions that correspond to carbonate chemistry conditions experienced by organisms in natural habitats and interpret experimental outcomes accordingly [21,22].

However, largely missing from this discussion is the observation that carbonate chemistry commonly covaries with other biologically relevant variables including temperature and oxygen.

In some regions, the strength of these associations has permitted the development of semi-mechanistic predictive models of carbonate chemistry in coastal environments based on field measurements of temperature and oxygen [15,23]. Yet for researchers focused on laboratory OA experiments, these relationships are rarely incorporated into experimental designs. This oversight poses important potential drawbacks. Foremost, if carbonate chemistry strongly covaries with temperature and oxygen, researchers risk running experiments with control water characteristics that are atypical of the habitat that a focal organism / life stage occupies. Physiological parameters including aerobic capacity and metabolic scope (the amount of energy that can be allocated to activities beyond those for basic existence) are strongly influenced by temperature, and adversely impacted by reductions in ambient oxygen availability or increases in CO<sub>2</sub> concentrations [24]. Under extreme warm and cool temperatures defining the upper and lower boundaries of the thermal window an organism survives within, the negative effects of oxygen scarcity or high concentrations of CO<sub>2</sub> are potentially exacerbated [24]. Because of the individual and interactive effects that temperature, oxygen, and pCO<sub>2</sub> may have on physiology and other metrics related to fitness and survival [6,24,25], knowledge of their covariability is essential for designing OA experiments that adequately characterize biological performance under contemporary relative to future acidified conditions.

Here, we have analyzed a large carbonate chemistry data set from Puget Sound, a large fjord estuary on the U.S. west coast [26]. Puget Sound is a highly altered ecosystem that suffers from multiple stressors stemming from extensive urbanization in the surrounding watershed. Habitat loss, shoreline development, pollution, alteration of freshwater flows, and overfishing are pervasive problems [27]. Despite these impacts, the Sound remains a biologically diverse system that directly supports economically important industries including aquaculture, commercial and recreational fisheries, and tourism [27]. Located on the eastern boundary of the NE Pacific, the Sound is supplied with CO<sub>2</sub>- and nutrient-rich waters that are upwelled onto the continental shelf [26,28]. Further CO<sub>2</sub> additions resulting from high rates of respiration act to make Puget Sound a highly vulnerable region for acidification [26]. Due to the reduced carbonate buffering capacity of the seawater, increases in pCO<sub>2</sub> and reductions in pH resulting from ocean uptake of anthropogenic CO<sub>2</sub> will occur more rapidly compared to open-ocean waters [26]. Similarly, the saturation state of seawater with respect to biogenic calcium carbonate minerals (calcite and aragonite) will

also decline at a faster rate, suggesting that calcifying species may be adversely affected sooner in Puget Sound relative to open ocean populations [26].

We sought to evaluate seasonal and regional variability in carbonate chemistry conditions as well as patterns of covariation with temperature, oxygen, and salinity. Our primary rationale was to provide an evaluation of carbonate chemistry variability in this system as part of a larger effort to develop OA experimental designs with improved ecological relevance. Our second objective was to evaluate the potential range of carbonate chemistry conditions experienced by members of the Puget Sound pelagic food web and how that range may change with additional CO<sub>2</sub>. In particular, we focused on potential simultaneous changes in temperature, oxygen, and carbonate chemistry conditions that are likely to be experienced by pelagic biota undergoing diel vertical migrations across regions and seasons in Puget Sound. In doing so, we aim to draw attention to the more general issue of identifying temperature, oxygen, and carbonate chemistry combinations that reflect plausible control and experimental conditions that are seasonally appropriate and correspond to the habitat occupied by the focal study organism or assemblage. We analyzed water chemistry data collected over three seasons (winter, summer, and fall), which afforded the opportunity to assemble seasonal snapshots of spatial variation in carbonate chemistry. Further, we collected data over two summers (August 2008 and September 2009) and two fall periods (October 2010 and October 2011). The inclusion of summer and fall sampling permitted an evaluation of interannual variation over a particularly dynamic season in Puget Sound. During the transition from late summer to early fall, intrusions of denser oceanic waters at depth result in the upward movement of the most oxygen-depleted waters in southern Hood Canal (a major sub-basin of Puget Sound) and southerly winds over Hood Canal result in episodic, localized upwelling events that bring oxygen-depleted, cooler waters to the surface at the southern end of Hood Canal [29]. We show that carbonate chemistry in Puget Sound covaries strongly with temperature and oxygen, but that the strength and sign of the relationship can change seasonally. Our findings offer insight into patterns of carbonate chemistry variability in this system, and we highlight their implications for the design and interpretation of OA laboratory experiments that simulate conditions representative of this and other coastal systems.

## Materials and Methods

We collected water samples in Puget Sound over five cruises that spanned winter (February 2008), summer (August 2008, September 2009) and fall (October 2010 and 2011; Table 1) as part of the Puget Sound Regional Synthesis Model Program (PRISM) conducted by the University of Washington in collaboration with the Washington Department of Ecology. The summer surveys correspond to conditions prior to the intrusion of denser oceanic waters at depth while the fall surveys capture this process. The full survey includes transect lines with stations in all four major sub-basins of Puget Sound as well as the Strait of Juan de Fuca (Fig. 1). For the current study, we focused on stations south of the sill at the entrance to Hood Canal (herein referred to as ‘Hood Canal’) and those spanning the northern entrance of Admiralty Inlet to northern Central Puget Sound (herein ‘Admiralty Inlet’). The bottom depth of the station near the sill in Hood Canal is ~100 m while the deepest stations near the center of the basin are ~170 m. Bottom depths of stations spanning Admiralty Inlet range from 70 m to 160 m. We focused our analysis on these regions because they possess contrasting

**Table 1.** Dates and stations sampled in Hood Canal and Admiralty Inlet for carbonate chemistry during PRISM cruises from 2008 to 2011.

| Cruise    | Sampling dates   | Stations sampled    |
|-----------|------------------|---------------------|
| Feb. 2008 | 5 – 7 Feb.       | 7–22, 24, 401       |
| Aug. 2008 | 12 – 13 Aug.     | 7–22, 24, 401       |
| Sep. 2009 | 30 Sep. – 1 Oct. | 7–11, 15–19, 21, 22 |
| Oct. 2010 | 15 – 30 Oct.     | 7–22, 24, 401       |
| Oct. 2011 | 12 – 13 Oct.     | 7–22, 24, 401       |

doi:10.1371/journal.pone.0089619.t001

mixing patterns and were sampled consistently across cruises. All stations were located in Washington State waters and no special permission was required to collect water samples. Field activities did not involve endangered or protected species.

At all stations, full water column profiles of temperature, salinity, and oxygen were obtained using a SeaBird (SBE) 911*plus* conductivity-temperature-density (CTD) instrument equipped with an SBE 43 oxygen sensor (SeaBird Electronics Inc., Bellevue, WA). Data were binned at 0.5-m intervals. To correct oxygen sensor measurements for potential offsets, discrete water samples were analyzed for oxygen by modified Winkler titration [30]. The salinity sensor on the CTD was factory-calibrated annually; the sensor was checked against discrete values collected on the cruise at a subset of stations, analyzed with a Guildline Autosol by the University of Washington, and calibrated, if necessary. Cruise CTD data are available through the NANOOS Visualization Server (<http://nvs.nanoos.org/CruisePrism>).

Discrete water samples were collected and analyzed for carbonate chemistry following previously published methods [12]. Briefly, water samples were obtained with Niskin-type bottles and analyzed in the laboratory for dissolved inorganic carbon (DIC), total alkalinity (TA), oxygen, and nutrients. DIC was analyzed using coulometric titration [31–33]. TA was measured by the potentiometric titration method [33]. Certified Reference Materials (CRMs) were analyzed with both the DIC and TA samples as an independent verification of instrument calibrations [33]. The DIC and TA data have a combined precision and accuracy of  $\sim 1 \mu\text{mol kg}^{-1}$  and  $\sim 2 \mu\text{mol kg}^{-1}$ , respectively, based on replicate sample analysis and the use of CRMs. Carbonate chemistry measurements from all surveys are currently being prepared for submission and archival at the Carbon Dioxide Information Analysis Center (<http://cdiac.ornl.gov/oceans/>).

For our analysis, we focused on carbonate chemistry variation as conveyed by changes in pCO<sub>2</sub> and the saturation state of aragonite ( $\Omega_{\text{ar}}$ ). We focused on pCO<sub>2</sub> because this is the most commonly used treatment variable in OA experiments and the parameter directly changed by anthropogenic CO<sub>2</sub> emissions. We evaluated variation in  $\Omega_{\text{ar}}$  because of its direct relationship to the stability of aragonite material in calcifying species. In supersaturated conditions ( $\Omega_{\text{ar}} > 1$ ), the formation of aragonite is energetically favored, while dissolution is favored in undersaturated conditions ( $\Omega_{\text{ar}} < 1$ ). We calculated pCO<sub>2</sub> and  $\Omega_{\text{ar}}$  using the R library 'seacarb' [34] with dissociation constants from Lueker et al. [35]. The pressure effect on the solubility was applied as described from the equation of Mucci [36], incorporating the adjustments to the constants recommended by Millero [37]. Based on the uncertainties in the DIC and TA measurements, uncertainty in the calculated aragonite saturation state and pCO<sub>2</sub> is approximately 0.015–0.04 and 5–10  $\mu\text{atm}$ , respectively.

We evaluated covariation of both pCO<sub>2</sub> and  $\Omega_{\text{ar}}$  with temperature, oxygen, and salinity within each survey for Hood Canal and Admiralty Inlet stations using simple linear regression separately for each variable. We evaluated the degree of association based on the variance explained by the regression models ( $R^2$ ). To comply with assumptions of normality in the response variable, both pCO<sub>2</sub> and  $\Omega_{\text{ar}}$  were log<sub>10</sub>-transformed prior to fitting the regression models. The fitted regressions offer information on linear trends between variables but are not suited for the prediction of carbonate chemistry variables using temperature, oxygen concentration, or salinity measurements beyond the region and time period sampled for each cruise.

Next, we sought to visually compare seasonal and spatial patterns in the vertical distribution of pCO<sub>2</sub> and  $\Omega_{\text{ar}}$ . To facilitate comparability, we predicted pCO<sub>2</sub> and  $\Omega_{\text{ar}}$  across depths at each station using continuous depth profiles of temperature, oxygen, and salinity based on relationships estimated with the discrete carbonate chemistry samples. The predicted pCO<sub>2</sub> and  $\Omega_{\text{ar}}$  values offered a higher vertical resolution of carbonate chemistry variability at each station than measurements from the discrete water samples alone. In preliminary stages of model development, we first considered multiple regression methods to predict pCO<sub>2</sub> and  $\Omega_{\text{ar}}$ , but significant collinearity in the predictor variables was observed in some regions and time periods (absolute value of Pearson's correlation coefficient greater than 0.90), which hampered their application [38]. To overcome this issue, we instead utilized partial least squares regression (PLSR) to model pCO<sub>2</sub> and  $\Omega_{\text{ar}}$ . PLSR is a dimension reduction technique that is well-suited to data sets that exhibit multicollinearity among predictor variables [39]. Essentially, latent factors (or component variables) are obtained from linear combinations of the predictor variables. The approach is similar to principal components regression except that in PLSR, component variables are obtained by maximizing the explained variance in the response variables rather than within the predictor variables [39]. We selected the optimal number of components by calculating the root mean square error of prediction (RMSEP) for each component using leave-one-out cross validation. We retained only those components without which the RMSEP did not show a significant decrease [40]. One PLSR model was estimated for pCO<sub>2</sub> and a second model was estimated for  $\Omega_{\text{ar}}$ . We used CTD temperature, salinity and oxygen concentration as predictor variables in both models. However, to predict relationships for all stations across time periods and regions, we also included a categorical variable that denoted the region and cruise from which a sample was obtained along with first-order interactions between the continuous CTD variables and the categorical variable. Doing so permitted the relationships between the carbonate chemistry parameters and temperature, salinity and oxygen to vary between regions and seasons. This was deemed necessary because preliminary examination of the data sets suggested differing relationships between the explanatory and response variables across seasons and regions. As with the simple linear regression models, both pCO<sub>2</sub> and  $\Omega_{\text{ar}}$  were log<sub>10</sub>-transformed to improve normality in the residual error structure. To evaluate model adequacy, we evaluated the explained variance in the response variable ( $R^2$ ), RMSEP, and checked for homogeneity in the residual error structure. We used the fitted model to predict pCO<sub>2</sub> and  $\Omega_{\text{ar}}$  values across depths using CTD and oxygen sensor measurements and visually compared patterns of carbonate chemistry variation between regions and seasons; we employed PLSR purely as a means to estimate high-resolution vertical profiles of pCO<sub>2</sub> and  $\Omega_{\text{ar}}$ .

We note that although previous studies have developed semi-mechanistic predictive multiple regression models of carbonate

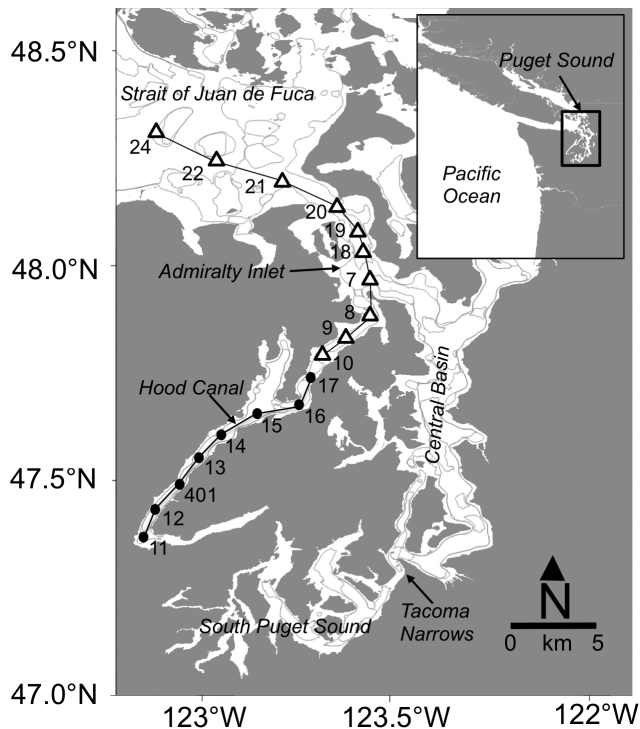

**Figure 1. Map of the study area and stations sampled for carbonate chemistry in Hood Canal (denoted by solid circle symbol) and Admiralty Inlet (open triangle) from Puget Sound, Washington, USA.** Sampling took place February and August 2008, September 2009, and October 2010 and 2011. Station numbering follows the convention of PRISM cruises (1998–2011, <http://nvs.nanoos.org/CruisePrism>). doi:10.1371/journal.pone.0089619.g001

chemistry using these variables in the California Current system [15,23], the application of similar methods to Puget Sound was hampered by several considerations beyond the multi-collinearity we observed among predictor variables. Namely, a key assumption of these models is that the stoichiometry of the CO<sub>2</sub>:O<sub>2</sub> relationship in constituent water masses is primarily controlled by aerobic respiration acting over the time span since last exposure to the atmosphere. Puget Sound receives waters upwelled onto the continental shelf that are entrained in subsurface flows through the Strait of Juan de Fuca, but that mix to the surface and combine with low salinity, seaward-flowing surface waters due to the presence of shallow sills at Admiralty Inlet and the entrance to Hood Canal [41]. As a result, CO<sub>2</sub>:O<sub>2</sub> relationships in the Sound reflect a combination of respiration in inflowing upwelled coastal waters, differential diffusion rates of CO<sub>2</sub> and O<sub>2</sub> between seawater and the atmosphere, and variable mixing with surface waters where CO<sub>2</sub>:O<sub>2</sub> relationships are strongly influenced by biological production and freshwater inputs. We expect that semi-mechanistic models may exist with the capacity to estimate at least some carbonate chemistry variables in Puget Sound (e.g. TA), but our primary aim here was to interpolate pCO<sub>2</sub> and Ω<sub>ar</sub> values between depths where discrete samples were collected at stations within each survey. The development of models to extrapolate carbonate chemistry parameters across time periods and locations outside our spatial and temporal sampling domain is beyond the scope of the present study but remains an area of active research.

In Puget Sound as elsewhere, many fish and zooplankton, including euphausiids, mysids, copepods, pteropods, and a large variety of fish and invertebrate larvae, undergo diel vertical migrations (DVM) and may swim vertical distances in excess of 50 m in less than an hour [42–46]. In stratified waters, diel vertical migrators may pass through water masses with drastically differing

temperature, oxygen, and carbonate chemistry conditions [45]. The prevalence of DVM in Puget Sound fish and invertebrates and our need to understand the response of these groups to acidification motivated our interest in describing and comparing potential carbonate chemistry, temperature, and oxygen conditions experienced by diel vertical migrators across seasons and regions. In particular, we evaluated how these variables may change simultaneously as organisms move between near-surface and subsurface waters and compared contemporary carbonate chemistry conditions experienced by diel vertical migrators with those assuming an increase in DIC due to future ocean uptake of anthropogenic CO<sub>2</sub>.

To estimate pCO<sub>2</sub> and Ω<sub>ar</sub> under elevated DIC conditions, we used an equilibrium approach based on the thermodynamic equations that describe the carbonate system [5]. From the outset, we recognized the complexity of physical (vertical and horizontal mixing, air-sea CO<sub>2</sub> fluxes, freshwater inputs) and biological processes (photosynthesis, respiration) that potentially regulate carbonate chemistry conditions in Puget Sound and therefore did not seek to generate precise predictions of pCO<sub>2</sub> and Ω<sub>ar</sub> corresponding to specific IPCC scenarios of CO<sub>2</sub> emissions. Rather, we considered a scenario in which the present-day anthropogenic DIC load in Puget Sound (~30 μmol kg<sup>-1</sup>; [26]) was quadrupled to 120 μmol kg<sup>-1</sup>. That is, we added 90 μmol kg<sup>-1</sup> to observed in situ DIC measurements from the discrete water samples, and recalculated the carbonate system to estimate future seawater pCO<sub>2</sub> and Ω<sub>ar</sub> (hereafter noted as pCO<sub>2</sub>\* and Ω<sub>ar</sub>\*). This DIC addition approximates potential anthropogenic CO<sub>2</sub> loads in mid-latitude surface ocean waters after equilibration with an 788 μatm pCO<sub>2</sub> atmosphere as predicted for the year 2100 based on the Intergovernmental Panel on Climate Change (IPCC) IS92a ‘continually increasing’ emissions scenario [1,5]. We

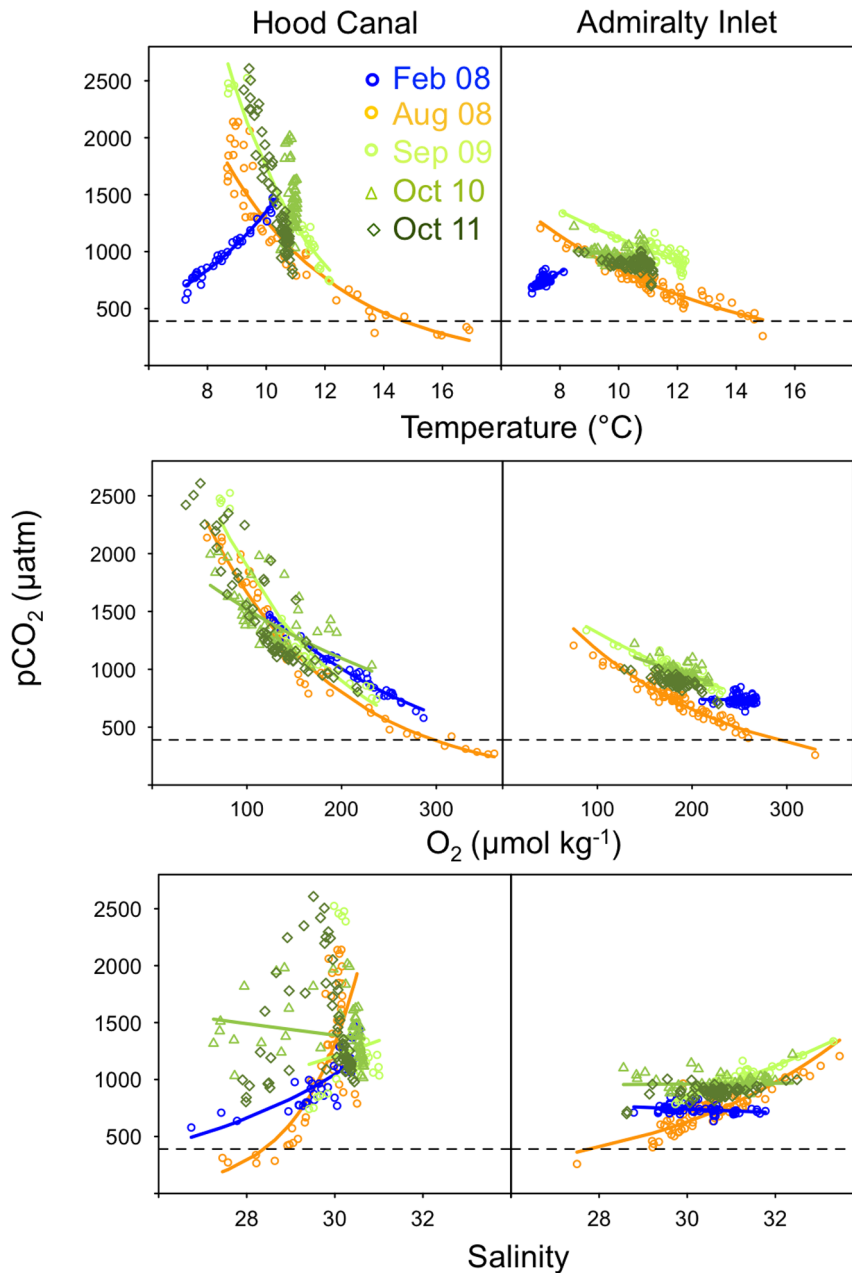

**Figure 2. Patterns of covariation between pCO<sub>2</sub> and temperature (upper), oxygen (middle), and salinity (lower panels) in Hood Canal and Admiralty Inlet, Washington.** For reference, the average atmospheric pCO<sub>2</sub> level (2008–2011 mean: 392 µatm) is noted by a dashed line. Trend lines correspond to relationships fitted using log<sub>10</sub>-transformed pCO<sub>2</sub>. doi:10.1371/journal.pone.0089619.g002

derived our DIC increment value from potential changes to inflowing marine waters to Puget Sound because river discharge comprises only 5% of the annual water exchange, and the median water residence time is ~80 days for Hood Canal and less than 60 days for the remaining sub-basins of Puget Sound [47]. Consequently, inflowing marine waters largely govern temperature, salinity, and nutrient loads in Puget Sound [28,41,48] and set initial conditions for carbonate chemistry in bottom waters entering Hood Canal as well [26]. The method carries the implicit assumption that alkalinity, respiration rates, and circulation patterns remain invariant. In summer, strong upwelling winds on the Washington coast supply deep, dense waters to the Sound

that are thought to have last been in contact with the atmosphere approximately 50 years prior and that acquired their anthropogenic CO<sub>2</sub> burden at that time [12]. The anthropogenic CO<sub>2</sub> burden in Puget Sound can therefore lag behind conditions in open-ocean surface waters by a few decades, and future DIC loads will depend partly on interannual changes to the seasonal upwelling regime. Recognizing these complexities, our application of a uniform increase in DIC across seasons and locations is meant to simplify and facilitate general comparisons of possible future carbonate chemistry variability. As with pCO<sub>2</sub> and  $\Omega_{ar}$ , we used CTD temperature, salinity, and oxygen values corresponding to pCO<sub>2</sub>\* and  $\Omega_{ar}$ \* from the discrete water samples to predict pCO<sub>2</sub>\*

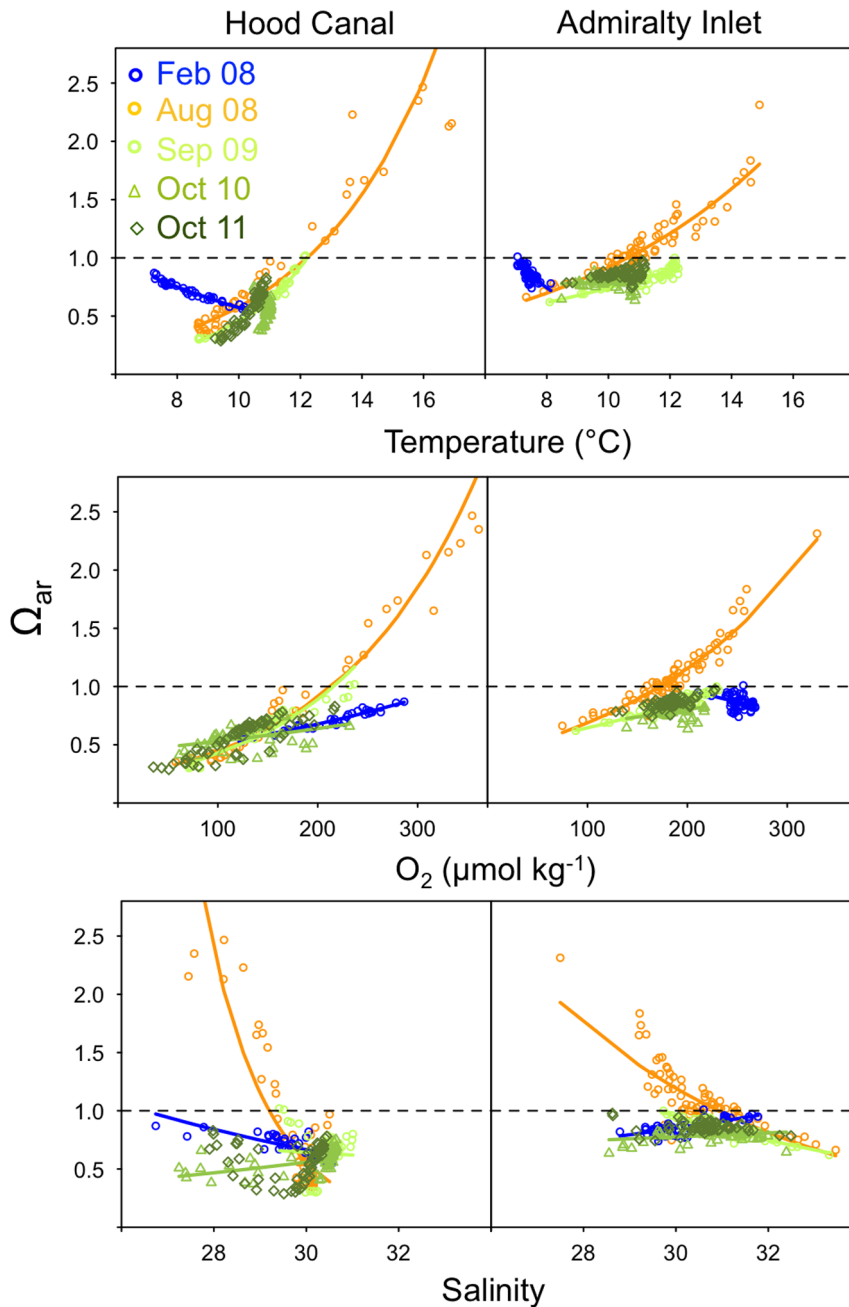

**Figure 3. Patterns of covariation between aragonite saturation state ( $\Omega_{ar}$ ) and temperature (upper), oxygen (middle), and salinity (lower panels) in Hood Canal and Admiralty Inlet, Washington.** Values below 1 (indicated by dashed line) correspond to corrosive conditions, those above are supersaturated with respect to aragonite. Trend lines correspond to relationships fitted using  $\log_{10}$ -transformed  $\Omega_{ar}$ . doi:10.1371/journal.pone.0089619.g003

and  $\Omega_{ar}^*$  across all depths using PLSR; model selection proceeded in a manner identical to that used for  $pCO_2$  and  $\Omega_{ar}$ .

Based on typical DVM patterns observed in Puget Sound zooplankton and fish [42,45], we assumed that zooplankton descended from 3 to 50 m at a rate of  $1 \text{ m min}^{-1}$  starting at 0600 hr, and ascended from 50 to 3 m beginning at 1800 hr at the same rate. Given this depth pattern over a 24-hour period, we extracted the corresponding CTD data and  $pCO_2$ ,  $pCO_2^*$ ,  $\Omega_{ar}$ , and  $\Omega_{ar}^*$  values predicted across depths from each station in the survey to generate time traces. We compared time traces across seasons and

between Admiralty Inlet and Hood Canal stations to evaluate potential high-frequency variation in carbonate chemistry resulting from diel movements, explore how carbonate chemistry changes simultaneously with other biologically important variables, and examine how carbonate chemistry may differ under CO<sub>2</sub>-enriched conditions as experienced by diel vertical migrators. To aid comparability, we used the same DVM across seasons and locations, but acknowledge that seasonal, regional, and interspecific variations in DVM may in fact be significant.

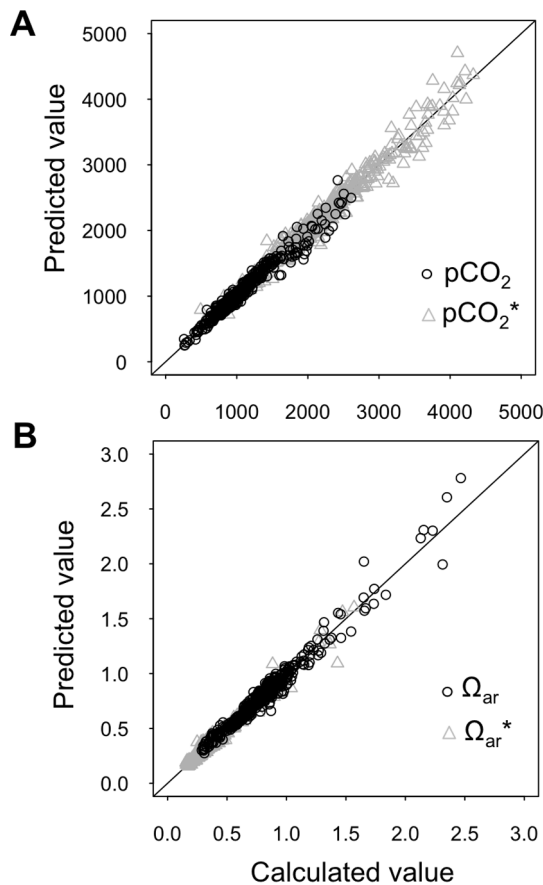

**Figure 4. (a) Predicted versus calculated pCO<sub>2</sub> and pCO<sub>2</sub>\* and (b)  $\Omega_{ar}$  and  $\Omega_{ar}^*$  based on partial least squares regression models for Puget Sound water samples obtained from 2008 to 2011.** pCO<sub>2</sub>\* and  $\Omega_{ar}^*$  values correspond to estimates based on the addition of 90  $\mu\text{mol kg}^{-1}$  DIC across all samples. doi:10.1371/journal.pone.0089619.g004

## Results

In Hood Canal, pCO<sub>2</sub> estimates obtained from discrete water samples ranged from 230 to 2610  $\mu\text{atm}$ , and the majority of water samples exceeded atmospheric pCO<sub>2</sub> levels (mean atmospheric pCO<sub>2</sub> from 2008 to 2011: 389  $\mu\text{atm}$ ; Fig. 2). Regression intercept and slope coefficients and the explained variance (based on the log<sub>10</sub>-transformed response variables) associated with the trend lines depicted in Fig. 2 are presented in Table S1. The Hood Canal August relationship between pCO<sub>2</sub> and temperature was negative and spanned the largest range of temperatures (8.5–17°C) relative to the other months surveyed (Fig. 2). In fall, the range of temperatures observed in both years was narrower relative to summer (~9–12°C; Fig. 2). Temperatures in winter ranged from 8 to 11°C in Hood Canal but showed the opposite relationship with pCO<sub>2</sub> as observed in the summer and fall (Fig. 2). Similar temperature-pCO<sub>2</sub> relationships were evident for Admiralty Inlet, but for all cruises the range of temperatures and pCO<sub>2</sub> levels were narrower. In general, variation in pCO<sub>2</sub> was more tightly associated with temperature in Hood Canal relative to Admiralty Inlet based on the higher  $R^2$  values observed in Hood Canal across all seasons (Table S1).

Negative relationships between pCO<sub>2</sub> and oxygen were evident in all seasons and years in both Hood Canal and Admiralty Inlet with the exception of Admiralty Inlet in February (Fig. 2, Table

S1). As with temperature, the larger range of O<sub>2</sub> values were found in Hood Canal relative to Admiralty Inlet (Fig. 2). In general, the negative relationship between pCO<sub>2</sub> and O<sub>2</sub> was stronger in Hood Canal than Admiralty Inlet based on  $R^2$  values (Table S1). Salinities, in contrast, spanned a relatively narrow range of values (~27 to 33; Fig. 2). In both regions, relationships between pCO<sub>2</sub> and salinity were positive in August. In the remaining seasons, pCO<sub>2</sub> and salinity relationships were weaker. Overall, pCO<sub>2</sub> was less tightly associated with salinity relative to temperature and oxygen across all seasons and both regions (Fig. 2; Table S1).

As expected, patterns of  $\Omega_{ar}$  were nearly inverse to those observed for pCO<sub>2</sub> (Fig. 3; Table S1). With the exception of August, when *in situ*  $\Omega_{ar}$  values ranged from 0.2 to 2.8,  $\Omega_{ar}$  values were ~1 or lower in both Hood Canal and Admiralty Inlet in all remaining months (Fig. 3). Similar to pCO<sub>2</sub>, the range of  $\Omega_{ar}$  values was highest in Hood Canal and lowest in Admiralty Inlet (Fig. 3). Patterns of association between  $\Omega_{ar}$  and temperature, oxygen, and salinity based on  $R^2$  values were similar to those of pCO<sub>2</sub> between regions and across seasons (Table S1).

Partial least square regression models of pCO<sub>2</sub> and  $\Omega_{ar}$  explained greater than 95 and 94% of variance in each survey, respectively (Fig. 4). RMSEPs (based on the original response variable scale) ranged between 4 and 50  $\mu\text{atm}$  and 0.02 and 0.05, for pCO<sub>2</sub> and  $\Omega_{ar}$ , respectively. The model fits suggested a sufficient level of predictive accuracy for estimating values across depths based on CTD depth profiles of oxygen, temperature, and salinity. We predicted pCO<sub>2</sub> and  $\Omega_{ar}$  across depths and examined temperature and oxygen depth profiles as well, but did not evaluate salinity due to the narrow range of values observed in the survey.

Overall, seawater pCO<sub>2</sub> values were above mean atmospheric levels (392  $\mu\text{atm}$ ) at all depths and across surveys with the exception of shallow waters (< 15 m depth) at several stations sampled in August 2008 (Fig. 5). Waters were also undersaturated with respect to aragonite ( $\Omega_{ar}<1$ ) at all depths sampled in February 2008 and October 2010 and 2011 (Fig. 5).  $\Omega_{ar}$  in near-surface waters (< 15 m) at some stations in Hood Canal in August 2008 and September 2009, however, were supersaturated ( $\Omega_{ar}>1$ ), while several stations at Admiralty Inlet sampled in August 2008 were supersaturated throughout the water column (Fig. 5).

In general, large differences in vertical gradients in carbonate chemistry, temperature, and oxygen conditions were apparent across seasons and regions. In February 2008, CTD depth profiles of temperature and oxygen and predicted values of pCO<sub>2</sub> and  $\Omega_{ar}$  indicated waters in Admiralty Inlet were well-mixed, and showed little vertical or inter-station variability (Fig. 5). In Hood Canal, several stations were also well-mixed, though vertical gradients were evident at several stations: deep waters were warmer, oxygen depleted, rich in pCO<sub>2</sub>, and exhibited lower  $\Omega_{ar}$  values relative to surface waters (Fig. 5). In August 2008 and September 2009, the water column was strongly stratified at several stations in Hood Canal, with warm, oxygen-rich, low pCO<sub>2</sub>, supersaturated waters occurring in near-surface waters. At depth, the opposite conditions prevailed. Variation in water conditions was comparatively lower at Admiralty Inlet both across stations and vertically (Fig. 5).

Stratification was again low at Admiralty Inlet stations in October 2010 and 2011 with near-uniform temperature, oxygen, and carbonate chemistry conditions throughout the water column and little variability between stations. However, in Hood Canal oxygen-poor, CO<sub>2</sub>-rich, and low  $\Omega_{ar}$  waters occurred in the top 50 m of the water column, while the opposite conditions were observed at depth (Fig. 5). Hypoxic conditions (oxygen concentrations less than ~60  $\mu\text{mol kg}^{-1}$ ) were observed in waters at depths shallower than 20 m at stations in southern Hood Canal in

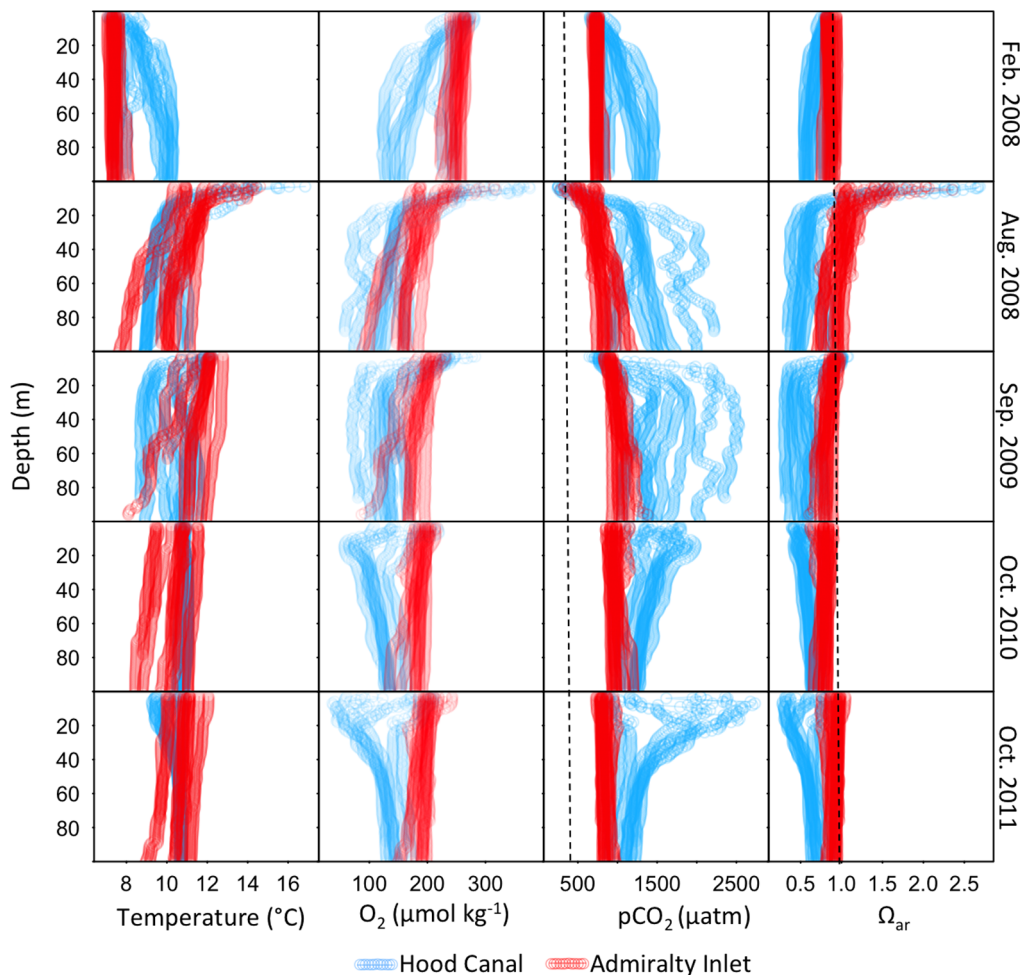

**Figure 5. Temperature and oxygen CTD depth profiles at stations sampled in Hood Canal and Admiralty Inlet.** pCO<sub>2</sub> and Ω<sub>ar</sub> values are model-based estimates obtained using partial least squares regressions. To aid interpretation, vertical dashed lines are overlaid denoting the average atmospheric pCO<sub>2</sub> (2008 to 2011 mean: 392 µatm) and the equilibrium aragonite saturation state (Ω<sub>ar</sub> = 1). Profiles are truncated at 100 m to aid comparability.  
doi:10.1371/journal.pone.0089619.g005

October 2011. Across all five surveys, the highest and lowest estimated pCO<sub>2</sub> and Ω<sub>ar</sub> values, respectively, were observed at these same stations and depths: estimates of pCO<sub>2</sub> exceeded 2400 and Ω<sub>ar</sub> values were less 0.4 (Fig. 5).

Time traces of temperature, oxygen, pCO<sub>2</sub>, and Ω<sub>ar</sub> concentrations corresponding to conditions experienced by hypothetical diel vertical migrators are depicted in Fig. 6. As suggested by the depth profiles, diel vertical migrators occupying the sampled stations likely experience simultaneous and abrupt changes in temperature, oxygen, and carbonate chemistry conditions in strongly stratified locations, and these were most prevalent in Hood Canal and Admiralty Inlet in August 2008 and September 2009 (Fig. 6). Time traces in August 2008 in Hood Canal, for instance, suggest that mean temperature, oxygen concentration, Ω<sub>ar</sub>, and pCO<sub>2</sub> experienced by diel vertical migrators in near-surface waters (3 m) at night and deep waters (50 m) during the day differed by 5.1°C, 214 µmol kg<sup>-1</sup>, 1.68, and 1100 µatm, respectively (Fig. 6). Importantly, the ranges across stations in temperature, oxygen, and carbonate chemistry conditions in both surface and deep waters were also notable during this time period in Hood Canal. The larger range in carbonate chemistry variables occurred in deep relative to near-surface waters: minimum and

maximum pCO<sub>2</sub> values in near-surface waters were estimated to be 250 and 480 µatm and in deep waters values were 980 and 2030 µatm, respectively. Ω<sub>ar</sub> ranged from 1.52 to 2.68 in near-surface waters and 0.37 to 0.77 in deep waters (Fig. 6).

In all seasons and regions, pCO<sub>2</sub>\* values were not only higher relative to pCO<sub>2</sub>, but the difference between near-surface and deep-water values increased (Fig. 6). In Hood Canal August 2008, the mean difference between near-surface and deep-water pCO<sub>2</sub> widened from 1100 to 2090 µatm with the uniform addition of DIC (Fig. 6). Correspondingly, Ω<sub>ar</sub> decreased across all depths as well, but the mean difference between near-surface and deep water was lower (1.68 vs. 0.98) relative to Ω<sub>ar</sub>, as the decline in the carbonate ion concentration slows as it approaches zero (Fig. 6).

In contrast to August 2008 and September 2009, the mean differences in temperature, oxygen, and carbonate chemistry variables between near-surface and deep waters were lower in October 2010 and 2011 (Fig. 6). However, the upward displacement of the waters with the lowest oxygen concentrations toward the surface in Hood Canal resulted in time traces in which diel vertical migrators encountered higher pCO<sub>2</sub> and lower Ω<sub>ar</sub> during the night rather than during the day (Fig. 6). Further, the range in pCO<sub>2</sub> and Ω<sub>ar</sub> conditions in Hood Canal was larger among



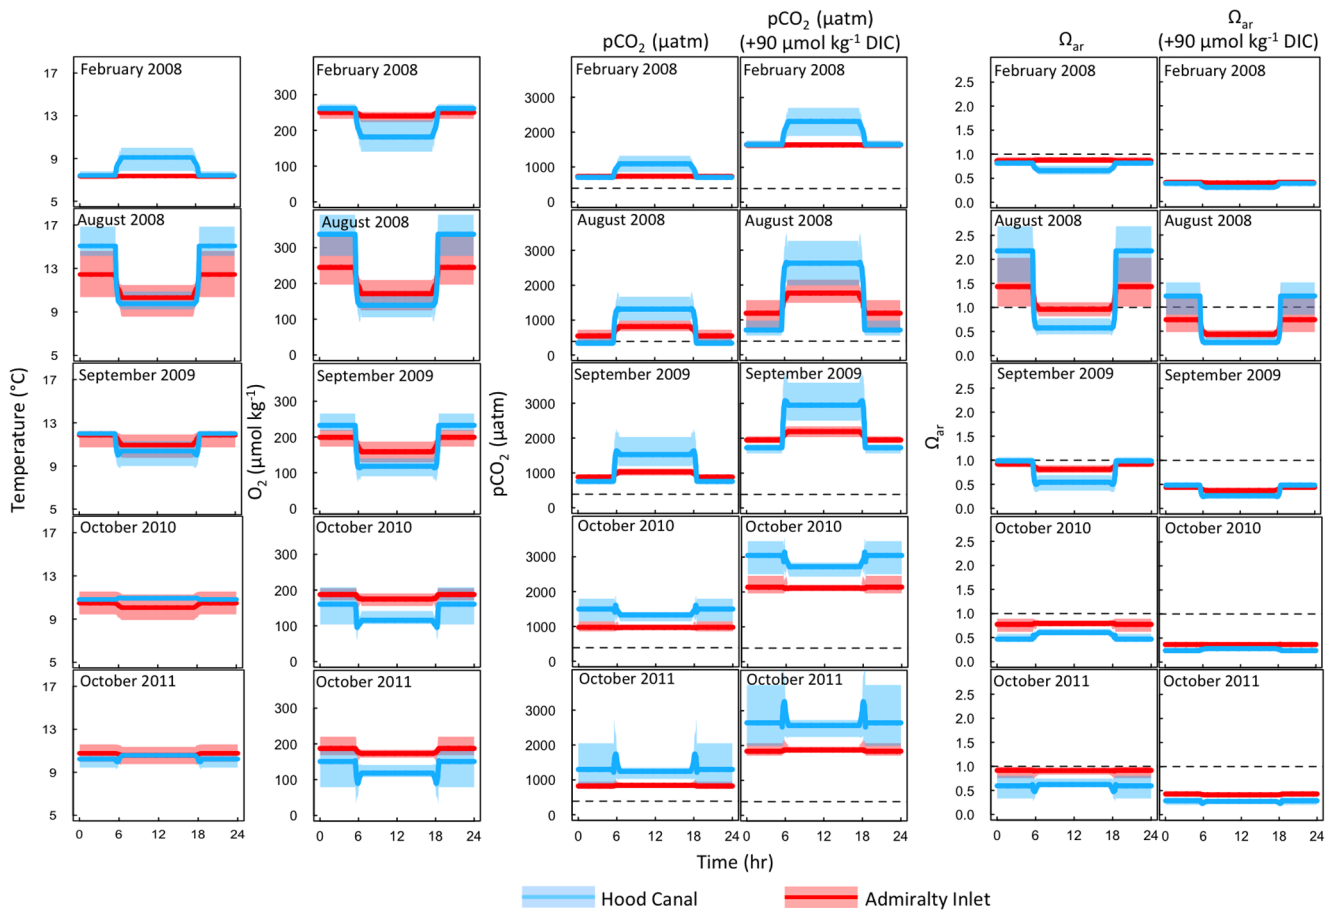

**Figure 6. Time traces of temperature, oxygen, pCO<sub>2</sub> and  $\Omega_{ar}$  conditions potentially experienced by hypothetical diel vertical migrators at stations sampled in Puget Sound, Washington, U.S.A.** Organisms ascend from 50 to 3 m at a rate of 1 m min<sup>-1</sup> beginning at 1800 hr and descend back to 50 m at 0600 hr. Colored bands correspond to maximum and minimum pCO<sub>2</sub> and  $\Omega_{ar}$  values and pCO<sub>2</sub>\* and  $\Omega_{ar}$ \* as estimated assuming a 90  $\mu\text{mol kg}^{-1}$  increase in DIC in Hood Canal and Admiralty Inlet stations. The solid lines correspond to mean values. For comparison, atmospheric pCO<sub>2</sub> (2008–2011 average: 392  $\mu\text{atm}$ ) is indicated by a dashed line.  $\Omega_{ar}$  values below 1 (denoted by dashed line) indicate undersaturated conditions with respect to aragonite. doi:10.1371/journal.pone.0089619.g006

stations in near-surface relative to deep waters, and these ranges increased and decreased, respectively, with an increase in DIC (Fig. 6).

Overall, the difference in near-surface and deep temperatures, oxygen concentrations, and carbonate chemistry conditions experienced by diel vertical migrators in February 2008 were lower than in the remaining surveys (Fig. 6). Similar to August 2008 and September 2009, oxygen concentrations and  $\Omega_{ar}$  were lower and pCO<sub>2</sub> higher for diel vertical migrators at depth during the day in Hood Canal, but unlike the remaining months surveyed the mean temperature was warmer by 1.7°C relative to near-surface waters experienced during the night. Further, the potential range of water conditions experienced by diel vertical migrators at a given depth across stations was narrower than observed in the remaining surveys (Fig. 6).

## Discussion

Our study expands on previous research on Puget Sound carbonate chemistry that noted waters greatly enriched in CO<sub>2</sub> relative to air-sea equilibration conditions in the winter and summer [26]. Here, we show that CO<sub>2</sub>-enriched conditions persist through the fall. We also show that carbonate chemistry conditions

covary with temperature and oxygen but that the direction and strength of these correlations change with season and between nearby regions characterized by differing levels of water mass mixing. Our findings suggest that fish and invertebrates that exhibit DVM behavior in stratified locations are likely to experience large, rapid changes in ambient carbonate chemistry conditions over the course of a single day during the summer and early fall months. Further, we show through simple calculations that a uniform increase in DIC not only elevates pCO<sub>2</sub> and lowers  $\Omega_{ar}$ , but also widens the absolute difference in these values between near-surface and subsurface waters. Together, our findings highlight the physicochemical complexity of coastal systems and the importance such data hold for the design of ecologically relevant OA experiments.

Our observations in September 2009 and October 2010 and 2011 add an additional layer of information to our general understanding of seasonal variability in carbonate chemistry in Hood Canal. Due to sluggish circulation and the availability of nutrients in inflowing marine and terrestrial waters, hypoxic conditions commonly occur in Hood Canal during the summer months [49]. As evidenced by oxygen and pCO<sub>2</sub> depth profiles in August 2008 and September 2009, aerobic respiration simultaneously draws down O<sub>2</sub> at depth and increases pCO<sub>2</sub>.

However, we show that bottom-water intrusions into Puget Sound and Hood Canal during October 2010 and 2011 resulted in the upward movement of low-oxygen waters as observed previously [45] but that these near-surface waters were CO<sub>2</sub>-replete and exhibited the most extreme pCO<sub>2</sub> and  $\Omega_{ar}$  values observed across all surveys. Fall bottom-water intrusions into the Sound occur during neap tides and their onset is influenced by storm-related fluctuations in the horizontal density gradient spanning the double-silled entrance at Admiralty Inlet [50,51]. Although such intrusions play a critical role in the renewal of deep water layers in Puget Sound, they also result in the surfacing of low oxygen, high pCO<sub>2</sub> waters which, if upwelled suddenly to the surface due to favorable southerly winds, can result in extensive fish kills [29]. Our observations suggest that organisms that reside in shallow waters to avoid low-oxygen, CO<sub>2</sub>-rich waters at depth in the summer may be unable to avoid exposure at some locations in Hood Canal as these waters circulate upward in the fall. Combined, our carbonate chemistry data set indicates that pCO<sub>2</sub> values are spatially and seasonally heterogeneous in Puget Sound as in other estuarine systems [52] and further underscores the need for researchers to consider natural variability in the design and interpretation of OA experiments.

Importantly, we show that carbonate chemistry conditions also covary with temperature and oxygen but that the strength and slope of the relationships change with season. Failure to consider covariation in carbonate chemistry with temperature or oxygen may result in experimental designs with ‘control’ treatments that have little correspondence to conditions that animals may have adapted to in nature and ‘acidified’ treatments that do not account for naturally high pCO<sub>2</sub> levels in many estuarine and coastal waters. For instance, strong negative relationships between pCO<sub>2</sub> and temperature in Hood Canal for August 2008 suggest that appropriate control pCO<sub>2</sub> values for experiments on a widely distributed animal from this region would depend on the temperatures considered in the experiment. Temperatures of 10 and 15°C occur within the top 50 m of the water column and have corresponding control pCO<sub>2</sub> values of 1270 and 360  $\mu\text{atm}$ , respectively, based on the linear regression between pCO<sub>2</sub> and temperature. Assuming a uniform increase in 90  $\mu\text{mol kg}^{-1}$  in DIC, the respective acidified treatments are 2150 and 760  $\mu\text{atm}$ , again based on the regression between pCO<sub>2</sub>\* and temperature. In contrast, experimental controls based on winter Hood Canal conditions that use temperatures of 8 and 10°C would have pCO<sub>2</sub> values corresponding to 850 and 1360 and pCO<sub>2</sub>\* values of 1380 and 1930  $\mu\text{atm}$ , respectively. Although there is increasing recognition that researchers should consider control treatments that reflect carbonate chemistry conditions experienced by the organism under study [11,18,21], little attention has been given to understanding patterns of carbonate chemistry covariability with temperature and oxygen. Given the combined effect environmental temperature, oxygen, and pCO<sub>2</sub> have on metabolic scope [53] and evidence indicating non-additive, interactive effects of these variables in ecological studies [6,54], we recommend care be taken in selecting appropriate values that correspond to those likely to be experienced by organisms in the field. Doing so may facilitate inferences from experimental results to population-level effects.

High-resolution carbonate chemistry time series have revealed considerable diel variability in coral reef [55,56], kelp forest [10,57], coastal upwelling [58], and shallow estuarine systems [59] that is primarily driven by oscillations in photosynthesis and respiration rates. For animals that undergo DVM in vertically heterogeneous regions, however, exposure to water masses with differing carbonate chemistry, temperature, and oxygen characteristics is also possible but has received only limited consideration

in the context of OA [60]. In Puget Sound, DVM behavior is common in a diversity of fish and invertebrate species, including zooplankton occurring in stratified regions of Hood Canal [42,45]. Developing experiments with temporally dynamic carbonate chemistry, temperature, and oxygen conditions that mimic the experience of organisms in the wild may offer more accurate baselines upon which responses to acidified treatments can be compared. Our hypothetical time traces offer a basis for developing such experimental designs and offer important insights. Foremost, we show that during the summer in particular, temperature, oxygen, and carbonate chemistry conditions simultaneously covary with depth, a consideration that has previously been overlooked in OA experiments focused on diel migrating animals from stratified waters [60]. Organismal performance (e.g., growth) may potentially improve in dynamic pCO<sub>2</sub> treatments that emulate natural diel oscillations in carbonate chemistry relative to static pCO<sub>2</sub> treatments [61], but we are unaware of studies that have simultaneously varied pCO<sub>2</sub>, temperature, and oxygen to replicate the full suite of environmental changes associated with DVM. The technical challenges associated with implementing dynamic, multi-stressor experiments are considerable but OA experimental facilities are becoming increasingly sophisticated and such systems are currently under development at several academic and government laboratories.

Our recalculation of the carbonate system to generate estimates of potential future pCO<sub>2</sub> and  $\Omega_{ar}$  values experienced by animals undergoing DVM showed that pCO<sub>2</sub> and  $\Omega_{ar}$  increased and decreased, respectively, at all depths as expected with an increased CO<sub>2</sub> load. However, the potential difference in pCO<sub>2</sub> values between near-surface and deep waters increased relative to contemporary observations, while the potential surface-to-deep difference for  $\Omega_{ar}$  decreased. This pattern results from nonlinearity in the carbonate system at near-surface ocean pH values: as DIC is added in the form of CO<sub>2</sub> (either from anthropogenic CO<sub>2</sub> emissions or respiration), the carbonate ion concentration of seawater declines, while the CO<sub>2</sub> concentration and pCO<sub>2</sub> forms of inorganic carbon increase exponentially [62,63]. In waters already burdened with high concentrations of CO<sub>2</sub> due to respiration, an increase in DIC results in an increase (decrease) in pCO<sub>2</sub> ( $\Omega_{ar}$ ) that will be larger (smaller) relative to less burdened waters [62,64]. Our estimates of potential change in carbonate chemistry variability as experienced by DVM fauna are qualitatively similar to simulations in other studies that have shown an amplification of natural variability in carbonate chemistry associated with increased DIC [65]. These findings suggest more broadly that changes in the mean as well as the variance of pCO<sub>2</sub> will accompany increased DIC loadings. The influence of changes to pCO<sub>2</sub> variance on organisms is poorly understood and warrants further attention.

In addition, we show that although spatial and vertical variation in carbonate chemistry is considerable in Puget Sound, additional DIC may place pCO<sub>2</sub> and  $\Omega_{ar}$  at most stations and depths outside the range of values observed presently across depths and stations. This possibility was most evident in winter where there was no overlap between present-day and future pCO<sub>2</sub> and  $\Omega_{ar}$  as experienced by fauna undergoing DVM. During winter, the water column is less stratified and conditions are more uniform across stations and depths [41]. Consequently, low pCO<sub>2</sub>, supersaturated refugia are absent and carbonate chemistry is relatively homogeneous. In contrast, some near-surface waters in August remained supersaturated ( $\Omega_{ar}$ ) and the pCO<sub>2</sub> at levels low, despite the DIC addition. These same near-surface waters initially possessed low DIC concentrations due to biological drawdown through photosynthesis and thus higher buffering capacity.

The general seasonal patterns observed suggest that species with CO<sub>2</sub>-sensitive life history stages that occur in winter are even less likely to find depths or regions with favorably low pCO<sub>2</sub> conditions in the future. For species with CO<sub>2</sub>-sensitive life history stages that occur in summer, the potential for carbonate chemistry refugia persisting in the future may be better because high rates of primary production can locally drive pCO<sub>2</sub> levels below air-sea equilibrium in the surface layer, though the benefits of such refugia depend on the suitability of other biological variables and their persistence in time and space. Our analysis also suggests that CO<sub>2</sub>-sensitive species may be more fully excluded from regions such as Admiralty Inlet that are well-mixed and therefore lack low pCO<sub>2</sub> refugia at most depths and stations relative to more heterogeneous regions like Hood Canal.

We limited our ocean acidification scenario to a uniform change in DIC. Our estimates therefore do not account for processes that may further alter carbonate chemistry and the vertical and spatial distribution of CO<sub>2</sub>, which may include climate variables (upwelling winds, circulation patterns, river discharge), changes in watershed use, eutrophication [9], and atmospheric deposition of nitrogen and sulfur from shipping vessels [66] or urban pollution [67]. Processes that reduce salinity (and thus TA) or that increase respiration (and DIC) increase pCO<sub>2</sub> [64], while warming directly affects carbonate system thermodynamics, resulting in solubility-related increases in pCO<sub>2</sub>, but more importantly influences ecosystem metabolism, which strongly affects carbonate chemistry [68]. Biogeochemical models of coastal and estuarine systems are increasingly utilized to identify the potential processes that dampen or exacerbate acidification [69,70] and may help clarify the contribution of climate variability and different human activities to future changes in Puget Sound's carbonate chemistry. We also note that our data set does not permit an evaluation of diurnal carbonate chemistry patterns, which can be pronounced in coastal surface waters, and is limited to stations in open-water habitats. We still lack information on shallower habitats such as mudflats, eelgrass meadows, pocket estuaries, and oyster beds, which are important components of the Puget Sound ecosystem. We recommend targeted sampling in these key habitats over seasonal cycles and the development of long-term monitoring programs in order to better identify baseline carbonate chemistry variability and to facilitate the attribution of the contribution of anthropogenic CO<sub>2</sub>.

Puget Sound receives waters upwelled along the Pacific Coast that are already burdened with anthropogenic CO<sub>2</sub> [26], and concentrations will continue to increase over the proceeding decades regardless of possible changes to atmospheric pCO<sub>2</sub>. This is because upwelled waters were last in contact with the atmosphere ~50 years prior to surfacing and therefore carry CO<sub>2</sub> burdens that reflect air-sea equilibration at that time [12]. Consequently, waters already in transit to upwelling centers on the

Pacific coast near Puget Sound carry increasing concentrations of anthropogenic CO<sub>2</sub> [12]. Although we are unable to stem the flow of CO<sub>2</sub>-enriched marine waters into Puget Sound, understanding how human-caused impacts (e.g., eutrophication, pollution, and altered river flows) exacerbate or buffer against the effects of ocean acidification on biota may help identify actions regional and local governments can take to reduce the effects of OA. A key uncertainty facing coastal ecosystem management, however, lies in the response of organisms and communities to ocean acidification and its interactions with other stressors [2]. Fundamental to addressing this uncertainty is the design of manipulative experiments in which control water conditions are representative of the system under study. Our analyses offer insight into seasonal patterns of covariation in carbonate chemistry with temperature and oxygen, and we suggest that such considerations are needed in order to draw useful ecological inferences from manipulative experiments. Given the potential for synergistic interactions between temperature, oxygen and carbonate chemistry on organismal physiology [24], developing a baseline understanding of how these variables naturally covary can facilitate the development of experiments with more relevance to questions regarding ocean acidification.

## Supporting Information

**Table S1** Estimated intercept and slope coefficients and explained variance ( $R^2$ ) corresponding to linear regression models relating log<sub>10</sub>-transformed pCO<sub>2</sub> and  $\Omega_{ar}$  to temperature, oxygen, and salinity. Slope coefficients that differ from zero are indicated by asterisks. Slopes with p-values <0.05, <0.01, and <0.001 correspond to \*, \*\*, and \*\*\*, respectively. (XLSX)

## Acknowledgments

The authors wish to thank the officers and crew of the R/V *Thomas G. Thompson*, EPA Ocean Survey Vessel *Bold*, and R/V *Robertson* for their assistance during the cruises and Cynthia Peacock, Geoff Lebon, Cathy Cosca, Corinne Bassin, Jill Coyle, Dana Greeley, Julia Bos, Kathy Krogslund, Amanda Gray, Megan Black, Sylvia Musielewicz, and Jennifer Nomura for their shipboard, laboratory, and graphics support of this research effort. Mariana Ribas-Ribas and an anonymous reviewer provided valuable comments on an earlier version of this work. This is PMEL contribution number 4031.

## Author Contributions

Conceived and designed the experiments: JCPR SRA. Performed the experiments: JCPR SRA. Analyzed the data: JCPR SRA. Contributed reagents/materials/analysis tools: JCPR SRA RAF JN MW. Wrote the paper: JCPR SRA PM.

## References

- Orr JC, Fabry VJ, Aumont O, Bopp L, Doney SC, et al. (2005) Anthropogenic ocean acidification over the twenty-first century and its impact on calcifying organisms. *Nature* 437: 681–686.
- Doney SC, Fabry VJ, Feely RA, Kleypas JA (2009) Ocean Acidification: The Other CO<sub>2</sub> Problem. *Ann Rev Mar Sci* 1: 169–192.
- Caldeira K, Wickett ME (2003) Anthropogenic carbon and ocean pH. *Nature* 425: 365–365.
- Feely RA, Sabine CL, Lee K, Berelson W, Kleypas J, et al. (2004) Impact of anthropogenic CO<sub>2</sub> on the CaCO<sub>3</sub> system in the oceans. *Science* 305: 362–366.
- Orr J (2011) Recent and future changes in ocean carbonate chemistry. In: Gattuso J, Hansson L, editors. *Ocean Acidification*. New York, NY: Oxford University Press. pp. 41–66.
- Kroeker KJ, Kordas RL, Crim R, Hendriks IE, Ramajo L, et al. (2013) Impacts of ocean acidification on marine organisms: quantifying sensitivities and interaction with warming. *Global Change Biology* 19: 1884–1898.
- Koch M, Bowes G, Ross C, Zhang XH (2013) Climate change and ocean acidification effects on seagrasses and marine macroalgae. *Global Change Biology* 19: 103–132.
- Fabry VJ, Scibel BA, Feely RA, Orr JC (2008) Impacts of ocean acidification on marine fauna and ecosystem processes. *ICES J Mar Sci* 65: 414–432.
- Duarte CM, Hendriks IE, Moore TS, Olsen YS, Steckbauer A, et al. (2013) Is ocean acidification an open-ocean syndrome? Understanding anthropogenic impacts on seawater pH. *Estuar Coasts*: 1–16.
- Hofmann GE, Smith JE, Johnson KS, Send U, Levin LA, et al. (2011) High-frequency dynamics of ocean pH: a multi-ecosystem comparison. *PLoS ONE* 6: e28983.
- Andersson A, Mackenzie F (2012) Ocean acidification: setting the record straight. *Biogeosciences* 9: 893–905.

12. Feely RA, Sabine CL, Hernández-Ayón JM, Ianson D, Hales B (2008) Evidence for upwelling of corrosive “acidified” water onto the continental shelf. *Science* 320: 1490–1492.
13. Harris KE, DeGrandpre MD, Hales B (2013) Aragonite saturation state dynamics in a coastal upwelling zone. *Geophys Res Lett* 40: 2720–2725.
14. Hauri C, Gruber N, Vogt M, Doney SC, Feely RA, et al. (2013) Spatiotemporal variability and long-term trends of ocean acidification in the California Current System. *Biogeosciences* 10: 193–216.
15. Alin SR, Feely RA, Dickson AG, Hernández-Ayón JM, Juranek LW, et al. (2012) Robust empirical relationships for estimating the carbonate system in the southern California Current System and application to CalCOFI hydrographic cruise data (2005–2011). *J Geophys Res* 117: C05033.
16. Evans W, Hales B, Strutton PG (2011) Seasonal cycle of surface ocean pCO<sub>2</sub> on the Oregon shelf. *J Geophys Res* 116: C05012.
17. Frieder C, Nam S, Martz T, Levin L (2012) High temporal and spatial variability of dissolved oxygen and pH in a nearshore California kelp forest. *Biogeosciences* 9: 3917–3930.
18. McElhany P, Busch DS (2012) Appropriate pCO<sub>2</sub> treatments in ocean acidification experiments. *Mar Biol* 160: 1807–1812.
19. Andersson AJ, Mackenzie FT (2012) Revisiting four scientific debates in ocean acidification research. *Biogeosciences* 9: 893–905.
20. Waldbusser GG, Salisbury JE (2013) Ocean acidification in the coastal zone from an organism’s perspective: multiple system parameters, frequency domains, and habitats. *Ann Rev Mar Sci*. DOI: 10.1146/annurev-marine-121211-172238
21. Yu PC, Matson PG, Martz TR, Hofmann GE (2011) The ocean acidification seascape and its relationship to the performance of calcifying marine invertebrates: Laboratory experiments on the development of urchin larvae framed by environmentally-relevant pCO<sub>2</sub> / pH. *J Exp Mar Biol Ecol* 400: 288–295.
22. Hettinger A, Sanford E, Hill T, Hosfelt J, Russell A, et al. (2013) The influence of food supply on the response of Olympia oyster larvae to ocean acidification. *Biogeosciences* 10: 6629–6638.
23. Juranek LW, Feely RA, Peterson WT, Alin SR, Hales B, et al. (2009) A novel method for determination of aragonite saturation state on the continental shelf of central Oregon using multi-parameter relationships with hydrographic data. *Geophys Res Lett* 36: L24601.
24. Pörtner H-O (2010) Oxygen-and capacity-limitation of thermal tolerance: a matrix for integrating climate-related stressor effects in marine ecosystems. *J Exp Biol* 213: 881–893.
25. Pörtner HO, Farrell AP (2008) Physiology and climate change. *Science* 322: 690–692.
26. Feely RA, Alin SR, Newton J, Sabine CL, Warner M, et al. (2010) The combined effects of ocean acidification, mixing, and respiration on pH and carbonate saturation in an urbanized estuary. *Estuar Coast Shelf Sci* 88: 442–449.
27. PSP (2007) Puget Sound Conservation and Recovery Plan. Puget Sound Partnership, Olympia, WA. 90 p.
28. Mackas DL, Harrison PJ (1997) Nitrogenous nutrient sources and sinks in the Juan de Fuca Strait/Strait of Georgia/Puget Sound estuarine system: assessing the potential for eutrophication. *Estuar Coast Shelf Sci* 44: 1–21.
29. Newton J, Bassin C, Devol A, Kawase M, Ruef W, et al. (2008) Hypoxia in Hood Canal: an overview of status and contributing factors. In: Proceedings of the 2007 Georgia Basin Puget Sound Research Conference, Olympia, WA.
30. Carpenter JH (1965) The Chesapeake Bay Institute technique for the Winkler dissolved oxygen method. *Limnol Oceanogr* 10: 141–143.
31. Johnson KM, King AE, Sieburth JM (1985) Coulometric DIC analyses for marine studies: An introduction. *Mar Chem*: 61–82.
32. Johnson KM, Sieburth JM, Williams PJL, Brandstrom L (1987) Coulometric total carbon-dioxide analysis for marine studies e automation and calibration. *Mar Chem* 21: 117–133.
33. Dickson A, Sabine C, Christian J (2007) Guide to Best Practices for Ocean CO<sub>2</sub> Measurements. PICES Special Publication vol. 3, 191 p.
34. Lavigne H, Gattuso J (2010) Seacarb: seawater carbonate chemistry with R. R package version 2.4.3.
35. Lueker TJ, Dickson AG, Keeling CD (2000) Ocean pCO<sub>2</sub> calculated from dissolved inorganic carbon, alkalinity, and equations for K<sub>1</sub> and K<sub>2</sub>: validation based on laboratory measurements of CO<sub>2</sub> in gas and seawater at equilibrium. *Mar Chem* 70: 105–119.
36. Mucci A (1983) The solubility of calcite and aragonite in seawater at various salinities, temperatures, and one atmosphere total pressure. *American Journal of Science* 283: 780–799.
37. Millero FJ (1995) Thermodynamics of the carbon-dioxide system in the oceans. *Geochim Cosmochim Acta* 59: 661–677.
38. Kutner MH, Nachtsheim CJ, Neter J, Li W (2005) Applied linear statistical models. New York, NY: McGraw-Hill/Irwin. 1396 p.
39. Carrascal LM, Galvan I, Gordo O (2009) Partial least squares regression as an alternative to current regression methods used in ecology. *Oikos* 118: 681–690.
40. Mevik B-H, Wehrens R (2007) The pls package: principal component and partial least squares regression in R. *J Stat Softw* 18: 1–24.
41. Moore SK, Mantua NJ, Newton JA, Kawase M, Warner MJ, et al. (2008) A descriptive analysis of temporal and spatial patterns of variability in Puget Sound oceanographic properties. *Estuar Coast Shelf Sci* 80: 545–554.
42. Parker-Stetter SL, Horne JK, Langness MM (2009) The influence of midwater hypoxia on nekton vertical migration. *ICES J Mar Sci* 66: 1296–1302.
43. Frost BW (1988) Variability and possible adaptive significance of diel vertical migration in *Calanus pacificus*, a planktonic marine copepod. *Bull Mar Sci* 43: 675–694.
44. Bollens SM, Frost BW, Lin TS (1992) Recruitment, growth, and diel vertical migration of *Euphausia pacifica* in a temperate fjord. *Mar Biol* 114: 219–228.
45. Parker-Stetter SL, Horne JK (2009) Nekton distribution and midwater hypoxia: A seasonal, diel prey refuge? *Estuar Coast Shelf Sci* 81: 13–18.
46. Osgood KE, Frost BW (1994) Ontogenetic diel vertical migration behaviors of the marine planktonic copepods *Calanus pacificus* and *Metridia lucens*. *Mar Ecol Prog Ser* 104: 13–25.
47. Sutherland DA, MacCready P, Banas NS, Smedstad LF (2011) A model study of the Salish Sea estuarine circulation. *J Phys Oceanogr* 41: 1125–1143.
48. Steinberg PD, Brett MT, Bechtold JS, Richey JE, Porensky LM, et al. (2011) The influence of watershed characteristics on nitrogen export to and marine fate in Hood Canal, Washington, USA. *Biogeochemistry* 106: 415–433.
49. Brandenberger JM, Louchouart P, Creclius EA (2011) Natural and post-urbanization signatures of hypoxia in two basins of Puget Sound: historical reconstruction of redox sensitive metals and organic matter inputs. *Aquat Geochem* 17: 645–670.
50. Cannon GA, Holbrook JR, Pashinski DJ (1990) Variations in the onset of bottom-water intrusions over the entrance sill of a fjord. *Estuaries* 13: 31–42.
51. Lavelle J, Coklet E, Cannon G (1991) A model study of density intrusions into and circulation within a deep, silled estuary: Puget Sound. *J Geophys Res-Oceans* 96: 16779–16800.
52. Borges AV, Abril G (2011) Carbon Dioxide and Methane Dynamics in Estuaries. In: Wolanski E, McLusky DS, editors. *Treatise on Estuarine and Coastal Science*. Waltham: Academic Press. pp. 119–161.
53. Portner HO, Gutowska MA, Ishimatsu A, Lucassen M, Melzner F, et al. (2011) Effects of ocean acidification on nektonic organisms. In: Gattuso JP, Hansson LJ, editors. *Ocean Acidification*. New York: Oxford University Press. pp. 154–175.
54. Wernberg T, Smale DA, Thomsen MS (2012) A decade of climate change experiments on marine organisms: procedures, patterns and problems. *Global Change Biol* 18: 1491–1498.
55. Shaw EC, McNeil BI, Tilbrook B (2012) Impacts of ocean acidification in naturally variable coral reef flat ecosystems. *J Geophys Res-Oceans* 117: 1978–2012.
56. Gray SE, DeGrandpre MD, Langdon C, Corredor JE (2012) Short-term and seasonal pH, pCO<sub>2</sub> and saturation state variability in a coral-reef ecosystem. *Global Biogeochemical Cycles* DOI: 10.1029/2011GB004114.
57. Delille B, Borges A, Delille D (2009) Influence of giant kelp beds (*Macrocystis pyrifera*) on diel cycles of pCO<sub>2</sub> and DIC in the Sub-Antarctic coastal area. *Estuar Coast Shelf Sci* 81: 114–122.
58. Wootton JT, Pfister CA, Forester JD (2008) Dynamic patterns and ecological impacts of declining ocean pH in a high-resolution multi-year dataset. *Proc Nat Acad Sci* 105: 18848–18853.
59. Barton A, Hales B, Waldbusser GG, Langdon C, Feely RA (2012) The Pacific oyster, *Crassostrea gigas*, shows negative correlation to naturally elevated carbon dioxide levels: Implications for near-term ocean acidification effects. *Limnol Oceanogr* 57: 698–710.
60. Rosa R, Seibel BA (2008) Synergistic effects of climate-related variables suggest future physiological impairment in a top oceanic predator. *Proc Nat Acad Sci* 105: 20776–20780.
61. Dufault AM, Cumbo VR, Fan T-Y, Edmunds PJ (2012) Effects of diurnally oscillating pCO<sub>2</sub> on the calcification and survival of coral recruits. *Proc Roy Soc B-Biol Sci* 279: 2951–2958.
62. Sunda WG, Cai W-J (2012) Eutrophication induced CO<sub>2</sub>-acidification of subsurface coastal waters: interactive effects of temperature, salinity, and atmospheric pCO<sub>2</sub>. *Environ Sci Technol* 46: 10651–10659.
63. Gattuso J-P, Hansson L (2011) Ocean acidification: background and history. In: Gattuso J-P, Hansson L, editors. *Ocean Acidification*. Oxford: Oxford University Press. pp. 1–20.
64. Melzner F, Thomsen J, Koeve W, Oschlies A, Gutowska MA, et al. (2012) Future ocean acidification will be amplified by hypoxia in coastal habitats. *Mar Biol*: 1–14.
65. Shaw EC, McNeil BI, Tilbrook B, Matar R, Bates ML (2013) Anthropogenic changes to seawater buffer capacity combined with natural reef metabolism induce extreme future coral reef CO<sub>2</sub> conditions. *Global Change Biol* doi: 10.1111/gcb.12154.
66. Hasselöv IM, Turner DR, Lauer A, Corbett JJ (2013) Shipping contributes to ocean acidification. *Geophys Res Lett* 40: 2731–2736
67. Doney SC, Mahowald N, Lima I, Feely RA, Mackenzie FT, et al. (2007) Impact of anthropogenic atmospheric nitrogen and sulfur deposition on ocean acidification and the inorganic carbon system. *Proc Nat Acad Sci* 104: 14580–14585.
68. Gypens N, Lancelot C, Borges AV (2004) Carbon dynamics and CO<sub>2</sub> air-sea exchanges in the eutrophied coastal waters of the Southern Bight of the North Sea: a modelling study. *Biogeosciences* 1: 561–589.
69. Bianucci L, Denman K (2012) Carbon and oxygen cycles: Sensitivity to changes in environmental forcing in a coastal upwelling system. *J Geophys Res: Biogeosciences* 117: 2005–2012.
70. Borges A, Gypens N (2010) Carbonate chemistry in the coastal zone responds more strongly to eutrophication than to ocean acidification. *Limnol Oceanogr* 55: 346–353.
